# Supplementary material for: The Effect of Small-Scale Irrigation on Smallholder Farmers' Livelihoods: A Case Study ofDugda District, Oromia, Ethiopia
Source: Research Square preprint supplement (doi:10.21203/rs.3.rs-7422787/v1), 2025-09-09
Supplement: Supplementary file 1 [file 4281eed2ac2a4eb835357596.docx]

**Supplementary Data**

**Table 2: Socio-demographic Characteristics of Sample Households (before matching)**

| **Variable** | **Category** | **Irrigators (N=190)** | **Non-irrigators (N=190)** | **t-test/χ²** |
| --- | --- | --- | --- | --- |
| Age of HH head (years) | Mean (SD) | 42.1 (9.8) | 44.5 (10.5) | 2.15* |
| Sex of HH head (% Male) | Percent | 89.5 | 86.3 | 1.02 |
| Family size (members) | Mean (SD) | 5.8 (2.1) | 5.3 (1.9) | 2.28** |
| Education of HH head (% Literate) | Percent | 65.3 | 58.4 | 2.11* |
| Landholding size (ha) | Mean (SD) | 1.8 (0.7) | 1.5 (0.6) | 4.12*** |
| Livestock ownership (TLU) | Mean (SD) | 4.5 (2.8) | 3.9 (2.5) | 2.01* |

***p<0.1, **p<0.05, ***p<0.01.**

**Table 3: Average Treatment Effect of Small-Scale Irrigation on Livelihood Capitals**

| **Livelihood Capital Indicator** | **ATT** | **Std. Error** | **t-value** |
| --- | --- | --- | --- |
| **Human Capital** |  |  |  |
| Food variety score | 0.35 | 0.15 | 2.33** |
| Education expenditure (ETB) | 650.4 | 280.1 | 2.32** |
| Health expenditure (ETB) | 210.8 | 155.3 | 1.36 |
| **Physical Capital** |  |  |  |
| Number of crop types | 0.82 | 0.25 | 3.28*** |
| Value of household assets (ETB) | 4850.6 | 1980.5 | 2.45** |
| Tropical Livestock Unit (TLU) | 0.41 | 0.28 | 1.46 |
| **Natural Capital** |  |  |  |
| Landholding size (ha) | 0.28 | 0.10 | 2.80*** |
| Land rental expenditure (ETB) | 1540.2 | 550.7 | 2.80*** |
| **Financial Capital** |  |  |  |
| On-farm income (ETB) | 12540.2 | 3100.8 | 4.04*** |
| Off/non-farm income (ETB) | 4100.5 | 1850.2 | 2.22** |
| Annual savings (ETB) | 3200.7 | 1100.4 | 2.91*** |
| Agricultural input expenditure (ETB) | 4215.7 | 1200.9 | 3.51*** |
| **Social Capital** |  |  |  |
| Membership in groups (dummy) | 0.18 | 0.08 | 2.25** |
| Expenditure on 'idir' (ETB) | 55.6 | 40.2 | 1.38 |

***Significant at p *<* 0.01; **significant at p *<* 0.05; *significant at p *<* 0.1. SAVE = amount of money saved by the household in a year (ETB); CREDIT = amount of annual credit accessed by the household for production purposes (ETB).

.

**Figure 1: Proportion of Households Below the International Poverty Line ($1.90/day)**
